# Supplementary material
Source: publisher figshare collection journal article supplement (https://f1000.figshare.com/ndownloader/files/1231306)
Supplement: Supplementary file 1 [file 1231306]

shudaprsd	key_press	instructions	fixation	letter_onscreen	stimulus_interval	RT	Hits	CRs	FAs	Misses	or	oh	HR	FAR	Z_HR	Z_FAR	d
0	6	1980.285	2147.645	2149.179	2149.712	0.362	41	206	31	19	3	0	0.68333	0.12917	0.47704	-1.1303	1.6074
0	6			2151.244	2151.777	0.4
0	6			2153.31	2153.844	0.883
0	6			2155.377	2155.91	0.469
0	6			2157.443	2157.976	0.828
0	6			2159.509	2160.042	0.684
0	8			2161.575	2162.108	0.851
0	6			2163.642	2164.175	0.952
1	6			2165.708	2166.241	1.059
0	6			2167.773	2168.307	1.596
0	6			2169.84	2170.373	1.861
0	6			2171.906	2172.439	1.465
0	8			2173.973	2174.506	1.308
0	8			2176.038	2176.571	0.843
1	8			2178.104	2178.638	1.49
0	6			2180.171	2180.704	1.069
0	6			2182.237	2182.77	1.148
0	6			2184.303	2184.836	0.945
0	6			2186.369	2186.902	0.871
1	8			2188.435	2188.969	0.873
1	8			2190.502	2191.035	1.789
0	6			2192.567	2193.101	0.878
0	8			2194.634	2195.167	1.712
1	6			2196.7	2197.233	1.269
0	6			2198.767	2199.3	1.147
0	6			2200.833	2201.366	1.161
1	8			2202.898	2203.432	1.059
1	8			2204.965	2205.498	1.453
0	6			2207.031	2207.564	1.285
0	8			2209.098	2209.631	1.246
0	6			2211.163	2211.696	1.103
0	6			2213.229	2213.763	1.269
0	6			2215.296	2215.829	1.376
0	6			2217.362	2217.895	1.583
0	6			2219.428	2219.961	1.65
0	8			2221.494	2222.027	0.967
0	6			2223.56	2224.094	1.737
0	6			2225.627	2226.16	1.533
1	8			2227.692	2228.225	1.038
0	6			2229.759	2230.292	1.046
0	6			2231.825	2232.358	0.931
0	6			2233.892	2234.425	0.891
0	6			2235.958	2236.491	0.759
1	8			2238.023	2238.557	1.16
0	8			2240.09	2240.623	1.443
0	6			2242.156	2242.689	1.199
1	8			2244.223	2244.756	0.978
0	6			2246.288	2246.821	1.005
0	6			2248.354	2248.888	0.878
0	6			2250.421	2250.954	1.055
0	6			2252.487	2253.02	1.023
0	6			2254.553	2255.086	1.183
0	6			2256.619	2257.152	1.572
0	6			2258.685	2259.219	1.123
1	8			2260.752	2261.285	0.861
0	6			2262.817	2263.35	0.618
0	6			2264.884	2265.417	1.165
0	6			2266.95	2267.483	1.208
0	6			2269.017	2269.55	0.881
0	6			2271.082	2271.615	1.605
1	8			2273.148	2273.682	1.098
1	6			2275.215	2275.748	1.105
0	6			2277.281	2277.814	1.143
0	6			2279.347	2279.881	0.829
0	6			2281.413	2281.946	0.679
0	8			2283.479	2284.013	1.038
0	6			2285.546	2286.079	0.87
1	8			2287.612	2288.145	1.206
0	6			2289.678	2290.211	0.816
0	6			2291.744	2292.277	0.748
0	6			2293.81	2294.344	1.143
0	6			2295.877	2296.41	1.42
0	8			2297.942	2298.475	1.687
0	6			2300.009	2300.542	0.985
0	6			2302.075	2302.608	0.566
0	6			2304.142	2304.675	1.094
0	8			2306.207	2306.74	0.764
0	6			2308.273	2308.807	0.69
0	6			2310.34	2310.873	0.978
1	8			2312.406	2312.939	1.625
0	6			2314.472	2315.005	0.878
0	6			2316.538	2317.071	0.798
1	8			2318.604	2319.138	0.747
0	6			2320.671	2321.204	0.942
1	8			2322.737	2323.27	0.968
0	6			2324.803	2325.336	1.533
0	6			2326.869	2327.402	1.717
0	8			2328.935	2329.469	1.022
1	6			2331.002	2331.535	1.937
0	6			2333.067	2333.6	1.976
0	0			2335.134	2335.667	0
0	6			2337.2	2337.733	0.046
0	6			2339.267	2339.8	0.37
0	6			2341.332	2341.865	0.391
0	6			2343.398	2343.932	0.862
0	6			2345.465	2345.998	1.103
0	6			2347.531	2348.064	0.824
1	8			2349.597	2350.13	1.278
0	6			2351.663	2352.196	0.864
0	6			2353.729	2354.263	0.872
1	8			2355.796	2356.329	0.944
1	8			2357.861	2358.394	1.123
1	8			2359.928	2360.461	0.732
0	6			2361.994	2362.527	0.887
0	6			2364.06	2364.594	0.831
0	6			2366.126	2366.66	1.026
0	6			2368.192	2368.725	0.929
0	6			2370.259	2370.792	1.264
1	8			2372.325	2372.858	1.132
0	6			2374.392	2374.925	0.928
1	8			2376.457	2376.99	1.324
1	8			2378.523	2379.057	1.801
1	6			2380.59	2381.123	1.006
0	6			2382.656	2383.189	1.688
0	6			2384.722	2385.255	1.485
0	6			2386.788	2387.321	1.259
1	8			2388.854	2389.388	1.402
0	6			2390.921	2391.454	1.087
0	8			2392.986	2393.519	1.453
0	8			2395.053	2395.586	1.566
0	6			2397.119	2397.652	1.082
0	6			2399.185	2399.719	0.956
1	8			2401.251	2401.784	1.087
0	6			2403.317	2403.85	0.808
0	6			2405.384	2405.917	1.102
0	8			2407.45	2407.983	0.835
0	6			2409.516	2410.05	0.58
0	6			2411.582	2412.115	0.611
0	6			2413.648	2414.182	1.112
0	6			2415.715	2416.248	0.99
0	8			2417.781	2418.314	1.092
0	6			2419.847	2420.38	0.995
0	8			2421.913	2422.446	0.804
0	6			2423.979	2424.513	0.56
1	8			2426.046	2426.579	1.171
0	6			2428.111	2428.644	0.846
0	6			2430.178	2430.711	1.146
0	6			2432.244	2432.777	0.791
1	8			2434.31	2434.844	0.582
0	6			2436.376	2436.909	0.544
0	0			2438.442	2438.975	0
0	6			2440.509	2441.042	0.161
0	8			2442.575	2443.108	0.808
0	6			2444.641	2445.174	0.828
0	6			2446.707	2447.24	0.83
0	6			2448.773	2449.307	0.856
0	6			2450.84	2451.373	0.992
0	6			2452.905	2453.438	1.007
0	6			2454.972	2455.505	0.844
0	8			2457.038	2457.571	0.964
0	6			2459.104	2459.638	0.691
0	8			2461.17	2461.704	1.103
0	6			2463.236	2463.769	1.129
0	6			2465.303	2465.836	0.855
0	6			2467.369	2467.902	0.652
0	6			2469.435	2469.969	1.094
0	6			2471.501	2472.034	0.704
1	6			2473.567	2474.1	0.841
0	6			2475.634	2476.167	0.62
0	6			2477.7	2478.233	0.786
1	8			2479.766	2480.299	1
0	6			2481.832	2482.365	0.621
1	6			2483.898	2484.432	0.899
1	6			2485.965	2486.498	1.556
0	8			2488.03	2488.563	1.161
0	6			2490.097	2490.63	0.788
0	6			2492.163	2492.696	0.655
0	6			2494.229	2494.763	0.734
0	6			2496.295	2496.828	1.076
0	6			2498.361	2498.894	0.821
0	6			2500.428	2500.961	0.957
0	8			2502.494	2503.027	0.549
0	6			2504.56	2505.094	0.622
0	6			2506.626	2507.159	0.852
0	6			2508.692	2509.225	1.06
0	8			2510.759	2511.292	0.739
0	6			2512.825	2513.358	0.653
0	6			2514.891	2515.424	0.785
0	6			2516.957	2517.49	0.834
0	8			2519.023	2519.557	0.537
0	6			2521.09	2521.623	0.539
0	6			2523.155	2523.688	0.601
0	6			2525.222	2525.755	1.106
1	8			2527.288	2527.821	0.821
0	6			2529.354	2529.888	0.648
0	6			2531.42	2531.953	0.597
0	6			2533.486	2534.019	0.535
0	6			2535.553	2536.086	0.97
0	6			2537.619	2538.152	1.377
0	8			2539.684	2540.218	0.964
0	6			2541.751	2542.284	0.714
0	6			2543.817	2544.35	0.863
0	6			2545.884	2546.417	0.671
0	8			2547.95	2548.482	1.71
0	6			2550.016	2550.549	0.775
0	6			2552.082	2552.615	0.607
0	6			2554.148	2554.682	1.119
0	6			2556.215	2556.748	0.992
1	6			2558.28	2558.813	1.909
0	6			2560.347	2560.88	1.969
0	0			2562.413	2562.946	0
0	6			2564.479	2565.013	0.433
0	6			2566.545	2567.078	0.898
0	6			2568.611	2569.144	0.543
0	6			2570.678	2571.211	0.761
1	8			2572.744	2573.277	0.582
0	6			2574.809	2575.343	0.691
0	6			2576.876	2577.409	0.698
0	6			2578.942	2579.475	0.659
1	8			2581.009	2581.542	0.368
0	6			2583.074	2583.607	0.91
1	8			2585.141	2585.674	0.525
0	6			2587.207	2587.74	0.691
0	6			2589.273	2589.807	0.741
0	6			2591.339	2591.872	0.673
1	8			2593.405	2593.938	0.745
1	6			2595.472	2596.005	0.571
1	8			2597.538	2598.071	0.503
0	6			2599.604	2600.138	0.511
0	6			2601.67	2602.203	0.549
0	6			2603.736	2604.269	0.744
0	6			2605.803	2606.336	0.634
1	8			2607.869	2608.402	0.707
0	6			2609.934	2610.468	0.494
0	6			2612.001	2612.534	0.501
1	8			2614.067	2614.6	0.527
0	6			2616.134	2616.667	0.581
0	6			2618.199	2618.732	0.713
0	6			2620.266	2620.799	0.855
0	6			2622.332	2622.865	0.775
0	6			2624.398	2624.932	0.754
1	8			2626.464	2626.997	0.739
0	8			2628.53	2629.063	0.501
0	6			2630.597	2631.13	0.491
0	6			2632.663	2633.196	0.839
0	6			2634.728	2635.262	0.936
0	6			2636.795	2637.328	0.697
0	6			2638.861	2639.394	0.922
1	6			2640.928	2641.461	0.918
1	8			2642.994	2643.526	0.856
1	6			2645.059	2645.593	0.853
0	6			2647.126	2647.659	0.796
1	8			2649.192	2649.725	0.822
0	6			2651.259	2651.792	0.6
1	6			2653.324	2653.857	0.785
0	6			2655.391	2655.924	1.138
0	8			2657.457	2657.99	0.935
1	6			2659.523	2660.057	0.662
0	6			2661.589	2662.122	0.524
0	6			2663.655	2664.188	0.972
0	6			2665.722	2666.255	0.534
0	6			2667.788	2668.321	0.442
0	6			2669.853	2670.387	0.522
0	6			2671.92	2672.453	0.594
0	8			2673.986	2674.519	0.942
1	6			2676.053	2676.586	0.591
0	6			2678.118	2678.651	1.146
0	6			2680.184	2680.718	0.82
0	6			2682.251	2682.784	0.856
1	8			2684.317	2684.85	0.642
0	6			2686.383	2686.916	0.867
0	6			2688.449	2688.982	0.852
0	6			2690.516	2691.049	0.941
0	6			2692.582	2693.115	0.961
0	6			2694.648	2695.182	1.034
1	6			2696.714	2697.247	0.93
0	8			2698.78	2699.313	0.786
1	6			2700.847	2701.38	1.034
0	6			2702.913	2703.446	0.825
0	6			2704.978	2705.512	0.805
0	6			2707.045	2707.578	0.765
1	8			2709.111	2709.644	1.031
1	6			2711.178	2711.711	0.822
0	6			2713.243	2713.776	0.778
0	6			2715.309	2715.843	0.693
0	8			2717.376	2717.909	0.776
0	6			2719.442	2719.975	0.568
0	6			2721.508	2722.041	1.039
0	6			2723.574	2724.107	0.637
0	6			2725.641	2726.174	0.591
0	6			2727.707	2728.24	1.127
0	6			2729.772	2730.306	0.685
1	6			2731.839	2732.372	0.944
0	6			2733.905	2734.438	0.999
0	6			2735.972	2736.505	0.954
0	6			2738.037	2738.57	0.74
0	6			2740.103	2740.637	0.678
0	6			2742.17	2742.703	0.744
0	6			2744.236	2744.769	0.653
1	8			2746.303	2746.836	0.718
0	6			2748.368	2748.901	0.552
0	6			2750.434	2750.968	0.794
1	8			2752.501	2753.034	0.989
0	6			2754.567	2755.1	0.593
0	6			2756.633	2757.166	0.56
0	6			2758.699	2759.232	0.867
0	6			2760.766	2761.299	0.728
0	8			2762.832	2763.365	0.643
0	6			2764.897	2765.431	0.353
0	6			2766.964	2767.497	0.706
